# Supplementary material for: ELISA Methods Based on Monoclonal Antibodies for the Serological Diagnosis of Lumpy Skin Disease
Source: Hindawi journal article supplement (doi:10.1155/2023/8378153), 2023-07-27
Supplement: f1 [file 8378153.f1.pdf]

Table S1: Cattle sera collected weekly up to 28 days post experimental infection with LSDV. The virus used for the infection of each animal and results of VNT, ID.vet Capripox DA ELISA, and the new competitive and indirect ELISAs based on monoclonal antibodies are reported. The positive results are highlighted with the \* symbol, according to the cut-off value established for each test.

| Inoculated virus                | Animal ID | dpi | VNT (titer) | Capripox DA ELISA (ID.vet) (S/P%) | MAbs-based Competitive ELISA (PI) | MAbs-based Indirect ELISA (OD) |
|---------------------------------|-----------|-----|-------------|-----------------------------------|-----------------------------------|--------------------------------|
| LSDV vaccine strain "Neethling" | 124       | -2  | <1:10       | 13                                | 0                                 | 0,018                          |
|                                 |           | 7   | <1:10       | 4                                 | 0                                 | 0,073                          |
|                                 |           | 14  | 1:18*       | 99*                               | 84*                               | 1,248*                         |
|                                 |           | 21  | 1:57*       | 168*                              | 94*                               | 1,418*                         |
|                                 |           | 28  | 1:45*       | 196*                              | 95*                               | 1,525*                         |
| LSDV vaccine strain "Neethling" | 128       | -2  | <1:10       | -4                                | 0                                 | 0                              |
|                                 |           | 7   | <1:10       | 9                                 | 0                                 | 0                              |
|                                 |           | 14  | 1:7         | -1                                | 66*                               | 0,810*                         |
|                                 |           | 21  | 1:7         | -6                                | 69*                               | 0,889*                         |
|                                 |           | 28  | 1:7         | 22                                | 73*                               | 0,965*                         |
| LSDV vaccine strain "Neethling" | 129       | -2  | <1:10       | -1                                | 0                                 | 0                              |
|                                 |           | 7   | <1:10       | 10                                | 0                                 | 0,033                          |
|                                 |           | 14  | 1:18*       | 34*                               | 78*                               | 0,552*                         |
|                                 |           | 21  | 1:45*       | 49*                               | 88*                               | 0,892*                         |
|                                 |           | 28  | 1:71*       | 101*                              | 94*                               | 1,206*                         |
| LSDV vaccine strain "Neethling" | 133       | -2  | <1:10       | 3                                 | 0                                 | 0                              |
|                                 |           | 7   | <1:10       | 16                                | 4                                 | 0,027                          |
|                                 |           | 14  | 1:13*       | 37*                               | 83*                               | 1,252*                         |
|                                 |           | 21  | 1:45*       | 36*                               | 85*                               | 1,515*                         |
|                                 |           | 28  | 1:180*      | 129*                              | 90*                               | 1,574*                         |
| LSDV vaccine strain "Neethling" | 193       | -2  | <1:10       | 4                                 | 0                                 | 0,089                          |
|                                 |           | 7   | <1:10       | 14                                | 0                                 | 0,043                          |
|                                 |           | 14  | <1:10       | 17                                | 53*                               | 0,812*                         |
|                                 |           | 21  | <1:10       | 43*                               | 62*                               | 0,919*                         |
|                                 |           | 28  | 1:7         | 36*                               | 65*                               | 0,895*                         |
| LSDV vaccine strain "Neethling" | 195       | -2  | <1:10       | -1                                | 0                                 | 0                              |
|                                 |           | 7   | <1:10       | 12                                | 0                                 | 0                              |
|                                 |           | 14  | <1:10       | 38*                               | 71*                               | 0,677*                         |
|                                 |           | 21  | <1:10       | 50*                               | 80*                               | 1,15*                          |
|                                 |           | 28  | 1:13*       | 88*                               | 81*                               | 1,038*                         |
| LSDV North Macedonia 2016       | 200       | -2  | <1:10       | 3                                 | 0                                 | 0,046                          |
|                                 |           | 7   | <1:10       | 13                                | 0                                 | 0,007                          |
|                                 |           | 14  | 1:28*       | 71*                               | 79*                               | 1,068*                         |
|                                 |           | 21  | 1:28*       | 169*                              | 87*                               | 1,308*                         |
|                                 |           | 28  | 1:90*       | 196*                              | 91*                               | 1,480*                         |
| LSDV North Macedonia 2016       | 285       | -2  | <1:10       | 7                                 | 0                                 | 0                              |
|                                 |           | 7   | <1:10       | 20                                | 0                                 | 0,037                          |
|                                 |           | 14  | 1:28*       | 42*                               | 88*                               | 1,212*                         |
|                                 |           | 21  | 1:57*       | 65*                               | 92*                               | 1,492*                         |
|                                 |           | 28  | 1:90*       | 136*                              | 94*                               | 1,517*                         |
| LSDV North Macedonia 2016       | 286       | -2  | <1:10       | 13                                | 0                                 | 0,168                          |
|                                 |           | 7   | <1:10       | 0                                 | 0                                 | 0,097                          |
|                                 |           | 14  | 1:14*       | -3                                | 60*                               | 1,069*                         |
|                                 |           | 21  | 1:36*       | 12                                | 75*                               | 1,165*                         |
|                                 |           | 28  | 1:45*       | 71*                               | 87*                               | 1,46*                          |
| LSDV North Macedonia 2016       | 477       | 0   | <1:10       | -1                                | 0                                 | 0                              |
|                                 |           | 7   | <1:10       | -2                                | 0                                 | 0,008                          |
|                                 |           | 14  | 1:100*      | 10                                | 68*                               | 0,871*                         |
|                                 |           | 21  | 1:200*      | 69*                               | 80*                               | 1,206*                         |
|                                 |           | 28  | 1:400*      | 190*                              | 88*                               | 1,398*                         |
| LSDV North Macedonia 2016       | 484       | 0   | <1:10       | 0                                 | 1                                 | 0,233                          |
|                                 |           | 7   | <1:10       | 0                                 | 6                                 | 0,166                          |
|                                 |           | 14  | 1:128*      | 89*                               | 76*                               | 1,355*                         |
|                                 |           | 21  | 1:200*      | 130*                              | 81*                               | 1,254*                         |
|                                 |           | 28  | 1:200*      | 166*                              | 88*                               | 1,407*                         |

|                              |      |    |         |      |     |        |
|------------------------------|------|----|---------|------|-----|--------|
| LSDV North<br>Macedonia 2016 | 487  | 0  | <1:10   | -1   | 0   | 0,01   |
|                              |      | 7  | <1:10   | -2   | 0   | 0      |
|                              |      | 14 | 1:25*   | 18   | 63* | 0,680* |
|                              |      | 21 | 1:400*  | 112* | 89* | 1,288* |
|                              |      | 28 | 1:1280* | 128* | 96* | 1,605* |
| LSDV North<br>Macedonia 2016 | 544  | -2 | <1:10   | -1   | 0   | 0      |
|                              |      | 7  | <1:10   | -2   | 0   | 0,073  |
|                              |      | 14 | 1:80*   | 24   | 74* | 1,292* |
|                              |      | 21 | 1:512*  | 64*  | 89* | 1,334* |
|                              |      | 28 | 1:320*  | 144* | 94* | 1,493* |
| LSDV North<br>Macedonia 2016 | 556  | -2 | <1:10   | 0    | 0   | 0      |
|                              |      | 7  | <1:10   | -2   | 0   | 0,016  |
|                              |      | 14 | 1:64*   | 94*  | 78* | 1,209* |
|                              |      | 21 | 1:200*  | 86*  | 89* | 1,443* |
|                              |      | 28 | 1:320*  | 208* | 95* | 1,571* |
| LSDV Nigeria 2019            | R-47 | -2 | <1:10   | 0    | 0   | 0      |
|                              |      | 7  | <1:10   | -1   | 6   | 0      |
|                              |      | 14 | <1:10   | 2    | 51* | 0,658* |
|                              |      | 21 | 1:13*   | 43*  | 93* | 0,994* |
|                              |      | 28 | 1:80*   | 153* | 96* | 1,114* |
| LSDV Nigeria 2019            | R-81 | -2 | <1:10   | 0    | 0   | 0      |
|                              |      | 7  | <1:10   | -2   | 0   | 0      |
|                              |      | 14 | 1:13*   | 10   | 66* | 0,778* |
|                              |      | 21 | 1:80*   | 50*  | 88* | 0,967* |
|                              |      | 28 | 1:100*  | 127* | 84* | 1,119* |
| LSDV Nigeria 2019            | R-83 | -2 | <1:10   | -1   | 15  | 0      |
|                              |      | 7  | <1:10   | -1   | 3   | 0,004  |
|                              |      | 14 | <1:10   | 13   | 53* | 0,459* |
|                              |      | 21 | 1:20*   | 89*  | 94* | 1,141* |
|                              |      | 28 | 1:50*   | 125* | 95* | 1,052* |
| LSDV Nigeria 2019            | R-84 | -2 | <1:10   | -1   | 14  | 0      |
|                              |      | 7  | <1:10   | -1   | 10  | 0      |
|                              |      | 14 | <1:10   | 17   | 76* | 0,662* |
|                              |      | 21 | 1:80*   | 92*  | 92* | 1,045* |
|                              |      | 28 | 1:64*   | 135* | 93* | 1,031* |
